# Supplementary material for: What Antarctic Plants Can Tell Us about Climate Changes: Temperature as a Driver for Metabolic Reprogramming
Source: MDPI journal article supplement (doi:10.3390/biom11081094), 2021-07-23
Supplement: s1 [file s1]

**Table S1.** List of primers used in the study and related information.

| Gene        | Gene description          | Primer sequences (5'-3')<br>forward/reverse   | Annealing Temperature<br>(°C) | Primers concentration<br>(nM) | Amplicon length<br>(bp) | Efficiency (E)<br>(%) | R <sup>2</sup> |
|-------------|---------------------------|-----------------------------------------------|-------------------------------|-------------------------------|-------------------------|-----------------------|----------------|
| <i>psbA</i> | Photosystem II protein D1 | TGGTGGAGCAGCGATGAAAG<br>GGGAACGTTTCTGCTCTTGGA | 60                            | 200                           | 131                     | 93.5                  | 0.990          |
| <i>vde</i>  | Violaxanthin de-epoxidase | CGTCTGCACAAGCTGTGAT<br>ATCTGGCACTCCGTTTCATC   | 64                            | 250                           | 157                     | 106.0                 | 0.995          |
